# 1                    **Modelling the laminar connectome of the human brain**

2    Ittai Shamir <sup>a</sup>, Omri Tomer <sup>b</sup>, Ronnie Krupnik <sup>b</sup>, Yaniv Assaf <sup>a,b</sup>

3    <sup>a</sup> Department of Neurobiology, Faculty of Life Sciences, Tel Aviv University, Tel Aviv, Israel

4    <sup>b</sup> Sagol School of Neuroscience, Tel Aviv University, Tel Aviv, Israel

5    Corresponding author: Ittai Shamir

6    Email: [ittai@post.tau.ac.il](mailto:ittai@post.tau.ac.il)

7    ORCID: 0000-0003-4028-5154

## 8    **Abstract**

9    The human connectome is the complete structural description of the network of connections and elements  
10    that form the ‘wiring diagram’ of the brain. Due to the current scarcity of information regarding laminar  
11    end points of white matter tracts inside cortical grey matter, tractography remains focused on cortical  
12    partitioning into regions, while ignoring radial partitioning into laminar components. To overcome this  
13    biased representation of the cortex as a single homogenous unit, we use a recent data-derived model of  
14    cortical laminar connectivity, which has been further explored and corroborated in the macaque brain by  
15    comparison to published studies. The model integrates multimodal MRI imaging datasets of both white  
16    matter connectivity and grey matter laminar composition into a laminar-level connectome. In this study  
17    we model the laminar connectome of healthy human brains (N=30) and explore them via a set of  
18    neurobiologically meaningful complex network measures. Our analysis demonstrates a subdivision of  
19    network hubs that appear in the standard connectome into each individual component of the laminar  
20    connectome, giving a fresh look into the role of laminar components in cortical connectivity and offering  
21    new prospects in the fields of both structural and functional connectivity.

22    **Key words:** computational models; connectomics; cortical layers; neuronal structures; anatomical  
23    mapping; brain network analysis

24

25

26 **Introduction**

27 The human connectome is the comprehensive structural description of the network of connections and  
28 elements that form the human brain's 'wiring diagram'. The importance of exploring the connectome  
29 lies not only in uncovering patterns of structural connectivity across the brain, but also in understanding  
30 the functional states that emerge from it. For these reasons and more, uncovering the complete human  
31 connectome has become a crucial and central mission in neuroscientific research (Sporns et al. 2005).

32 Since its foundation, the Human Connectome Project has lead the mission to map the connectome using  
33 non-invasive neuroimaging techniques, showcasing great progress particularly in MRI imaging of white  
34 matter connectivity (Van Essen et al. 2013; Setsompop et al. 2013). Concurrently to the progress in white  
35 matter imaging through MRI, promising strides have also been made in imaging of the laminar  
36 composition of cortical grey matter. The progress in imaging the substructure of cortical grey matter  
37 began with establishing that myelination causes shortening of T1 values (Clark et al. 1992). Next, T1  
38 values were linked to myeloarchitecture (Barbier et al. 2002; Duyn et al. 2007; Van Essen et al. 2019),  
39 and the correspondence between T1 clusters and cortical layers was established in rat brains (Barazany  
40 and Assaf 2012). Subsequent studies have shown that low resolution T1 MRI can also be used to provide  
41 information regarding cortical layers in the human brain (Glasser et al. 2014; Shafee et al. 2015; Lifshits  
42 et al. 2018). A complete methodological framework was then established for MRI-based quantification  
43 and visualization of the cortical laminar composition (Shamir et al. 2019).

44 Despite growing progress in connectomics, starting from the macroscale and progressing gradually into  
45 higher resolutions in meso- and microscales, the field remains inherently limited by the biased  
46 representation of the cortex as a single homogenous unit. Due to the current scarcity of information  
47 regarding laminar end points of white matter tracts inside the cortical grey matter, tractography remains  
48 focused on transverse partitioning of the cortex into regions, while ignoring radial partitioning into  
49 laminar components (Jbabdi and Johansen-Berg 2011).

50 The integration of macrostructural data regarding white matter connectomics and microstructural data  
51 regarding grey matter laminar composition poses a promising development in the field of connectomics  
52 (Johansen-Berg 2013). A recently published study offers a simplified granularity-based model of cortical  
53 laminar connectivity based on published tract tracing and histological findings, with the purpose of

54 integrating white and grey matter datasets derived from multimodal MRI imaging (Shamir and Assaf,  
55 2021a). The model is then further explored in the macaque brain and corroborated in its visual cortex by  
56 comparison to published studies (Shamir and Assaf 2021b). The resulting micro-level connectome offers  
57 a more detailed and unbiased representation of the connectome and offers new prospects in the field of  
58 both structural and functional connectivity on the laminar level.

59 In this study we model the laminar connectome of the healthy human brain (N=30 healthy subjects) and  
60 explore it via a set of neurobiologically meaningful complex network measures. We focus on  
61 investigating network hubs in the standard cortical connectome versus those in the cortical laminar  
62 connectome.

### 63 **Methods and materials**

64 The framework for modelling cortical laminar connectivity (Shamir and Assaf 2021a) was applied on a  
65 set of (N=30) healthy human subjects.

#### 66 **Subjects**

67 Thirty healthy human subjects (N=30), including 14 male and 16 female, 18-78 years old. Subjects were  
68 neurologically and radiologically healthy with no history of neurological diseases. The imaging protocol  
69 was approved by the institutional review boards of Sheba Medical Center and Tel Aviv University, where  
70 the MRI investigations were performed. All subjects signed informed consent before enrollment in the  
71 study.

72 Each subject was scanned on a 3T Magnetom Siemens Prisma (Siemens, Erlangen, Germany) scanner  
73 with a 64-channel RF coil. The scans include the following sequences:

- 74 1. A standard diffusion-weighted imaging (DWI) sequence, with the following parameters:  
75  $\Delta/\delta=60/15.5$  ms,  $b \text{ max}=5000$  (0 250 1000 3000 & 5000)  $\text{s/mm}^2$ , with 87 gradient directions, FoV  
76 204 mm,  $\text{maxG}= 7.2$ ,  $\text{TR}=5200$  ms,  $\text{TE}=118$  ms,  $1.5\times 1.5\times 1.5$   $\text{mm}^3$ ,  $128\times 128\times 94$  voxels. This  
77 sequence was used for mapping the cortical connectome.
- 78 2. An MPRAGE sequence, with the following parameters:  $\text{TR/TE} = 1750/2.6$  ms,  $\text{TI} = 900$  ms,  $1\times 1\times 1$   
79  $\text{mm}^3$ ,  $224\times 224\times 160$  voxels, each voxel fitted with a single T1 value. This sequence was used for  
80 delineating the cortical surfaces.

81 3. An inversion recovery echo planar imaging (IR EPI) sequence, with the following parameters:  
82 TR/TE = 10,000/30 ms and 60 inversion times spread between 50 ms up to 3,000 ms,  $3 \times 3 \times 3 \text{ mm}^3$ ,  
83  $68 \times 68 \times 42$  voxels, each voxel fitted with up to 7 T1 values (Lifshits et al. 2018). This sequence used  
84 for characterizing the cortical layers.

## 85 **Image processing**

86 The following datasets were analyzed across Brainnetome atlas regions, a connectivity-based  
87 parcellation which consists of 210 cortical regions and 36 subcortical subregions (Fan et al. 2016):

### 88 1. **Global white matter connectivity analysis**

89 Each DWI dataset was analyzed for global white matter connectivity using global tractography.  
90 Traditional tractography involves streamline estimation by inferring connectivity from local  
91 orientation fields. It has been proven that streamline estimation experiences difficulties in  
92 reconstructing long tracts, due to high false positive rates associated with strong tracts, alongside  
93 difficulties reconstructing complex geometries, due to the partial volume effect associated with  
94 crossing fibers (Maier-Hein et al. 2017).

95 Global tractography differs from streamline tracking conceptually and methodologically by  
96 finding the full track configuration that best explains the measured DWI data. As a result, this  
97 tractography method is less sensitive to noise, and the density of the resulting tractogram is more  
98 directly related to the data. The analysis was conducted using MRtrix3 software package, which  
99 uses a multi-tissue spherical convolution model that accounts for partial volumes (Tournier et al.  
100 2019), similarly to the analysis by Krupnik et al. (2021).

101 For a visualization of the resulting connectivity matrix of the 30-subject average, see figure 1a  
102 (below).

### 103 2. **Cortical laminar composition analysis**

104 Each IR EPI dataset and its corresponding MPRAGE were analyzed for cortical laminar  
105 composition using our original framework, according to the following four principal steps:

106 a. *IR decay function fit*: the low resolution fast echo planar imaging inversion recovery (EPI IR)  
107 protocol was utilized for estimation of multiple T1 components per voxel using the following  
108 IR decay function fit (Lifshits et al. 2018):

109  $M(TI_i) = \sum_{j=1}^7 M0_j \cdot (1 - 2e^{-TI_i/T_{1j}})$  (1)

110 Where:

111  $M(TI_i)$ - Magnetization at the  $i^{th}$  inversion recovery image, in other words the magnetization  
 112 measured for each specific T1 component

113  $M0_j$ - Predicted magnetization at  $TI=0ms$  for each T1 component (j) in the voxel

114  $T_{1j}$ - Longitudinal relaxation time for each T1 component

115 j was set up to 7 for the low resolution experiments, indicating fit to seven individual  
 116 exponential fits, based on the assumption that there are 7 T1 components in the tissue – 1 for  
 117 CSF, 1 for WM and heavily myelinated layer of the cortex and additional 5 cortical layers.

118 Normalization of each of the predicted magnetization values according to  $\frac{M0_j}{\sum_{i=1}^j M0_j}$  then  
 119 represents the voxel contribution of each corresponding T1 component (j).

120 b. *T1 probabilistic classification*: T1 values were then assigned to different brain tissues and  
 121 utilized to extract the subvoxel composition of each T1 layer (Lifshits et al. 2018; Barazany  
 122 and Assaf 2012; Peel et al. 2000; Shamir et al. 2019; Lotan et al. 2021). The T1 classification  
 123 process involved fitting the T1 histogram to a probabilistic mixture model consisting of t-  
 124 distributions. The probability of each t-distribution in the voxel was calculated according  
 125 Bayes' formula:

126  $P_k = \sum_{i=1}^7 f_i \cdot \frac{p(T_{1(i)}|k)p(k)}{p(T_{1(i)})}$  (2)

127 Where:

128  $k$ - A specific t-distribution

129  $T_{1(i)}$ - T1-value of the  $i^{th}$  component of the voxel

130  $f_i$ - Partial volume of  $T_{1(i)}$  (normalized as show in previous section)

131  $p(T_1)$ - General whole-brain probability of a  $T_1$ -value

132  $p(k)$ - Probability of t-distribution k

133  $p(T_1|k)$ - Probability of the  $T_1$ -value in t-distribution k

134 Fit to 18 t-distributions was deemed satisfactory according to evaluation of the Bayesian  
 135 information criterion for 1-20 t-distributions. Each resulting group of distributions then  
 136 corresponds to various types of brain tissue:

137 i. White matter (WM) characterized by low T1 values, represented by t-distribution 1-3.

- 138 ii. Gray matter (GM) characterized by mid-range T1 values, represented by t-distributions 4-  
 139 9, corresponding to 6 T1 layers. Since T1 is considered a measure of myelination (Clark  
 140 et al. 1992), T1 layers with higher indices (or smaller T1 values), are more myelinated and  
 141 are therefore located deeper in the cortical cross section. t-distributions 4,5,6,7,8, and 9 are  
 142 then termed T1 layers 6,5,4,3,2 and 1 (respectively).
- 143 iii. Cerebral spinal fluid (CSF) characterized by high T1 values, represented by t-distributions  
 144 10-18.
- 145 c. *Cortical volume sampling:* We then implemented a geometric solution to cortical sampling  
 146 based on a system of virtual spheres dispersed throughout the entire cortex. A sphere was  
 147 chosen as a robust alternative to cortical normals due to its symmetry and invariance to rotation  
 148 (Shamir et al. 2019). The sampling process started with delineation of the inner, mid, and outer  
 149 cortical surfaces using the *FreeSurfer* pipeline (Fischl 2012). The virtual spheres were then  
 150 generated with centers on the mid surface and edges tangential to both the inner and outer  
 151 cortical surfaces. Each hemispheric volume consists of ~75,000 spherical volumes with an  
 152 average radius of ~1 mm.
- 153 d. *Data sampling:* To sample the high resolution spheres in the low resolution T1 dataset  
 154 ( $3^3 \text{ mm}^3$ ), a super-resolution solution was implemented. The solution involved partitioning  
 155 each voxel into  $10^3$  subvoxels, each assigned location properties, primarily their location  
 156 inside or outside of a given sphere. Spherical volume weights were then assigned to each  
 157 sphere, corresponding to each voxel's contribution to its spherical volume, according to the  
 158 following:

$$159 \quad W_{\text{voxel}_i, \text{sphere}_j} = \frac{N_{\text{voxel}_i, \text{sphere}_j}}{N_{\text{sphere}_j}} \quad (3)$$

160 Where:

161  $W_{\text{voxel}_i, \text{sphere}_j}$  - Volume weight of voxel i per sphere j

162  $N_{\text{voxel}_i, \text{sphere}_j}$  - Number of subvoxels from voxel i located inside sphere j

163  $N_{\text{sphere}_j}$  - Total number of subvoxels located inside sphere j

164 The cortical composition of each sphere was then estimated by multiplying the volume  
 165 weights of each sphere by their corresponding voxel probability maps (see *T1 probabilistic*

166 *classification*). The process was repeated across all spheres, according to the following  
 167 equation:

$$168 \quad P(t_k/\text{sphere}) = \sum_{i=1}^M \sum_{k=2}^7 W_{\text{voxel}_i, \text{sphere}_j} \cdot P(t_k/\text{voxel}_i) \quad (4)$$

169 Where:

170  $P(t_k/\text{sphere})$ - Probability of t-distribution k per sphere

171 k- t-distributions 4,5,...,9, representing T1 layers 6,5,...,1 (respectively)

172 M- Number of voxels within which sphere j lies

173  $W_{\text{voxel}_i, \text{sphere}_j}$  - Volume weight of voxel i per sphere j

174  $P(t_k/\text{voxel}_i)$ - Probability of t-distribution k in voxel i

175 The resulting whole-brain cortical laminar composition is then simplified by grouping the  
 176 layers into three laminar components:

- 177 i. Supragranular (SG) laminar component, which includes T1 layers 1, 2, and 3.
- 178 ii. Granular (G) laminar component, which includes granular T1 layer 4.
- 179 iii. Infragranular (IG) component, which includes T1 layers 5 and 6.

180 For a visualization of the resulting cortical laminar composition of the three laminar components,  
 181 averaged across all 30 subjects, see figure 1b (below).

### 182 3. **Model of cortical laminar connectivity**

183 The multimodal MRI datasets were integrated using the data-derived, granularity-based model of  
 184 cortical laminar connectivity (Shamir and Assaf 2021a, b). The model includes a set of whole-  
 185 brain laminar-level connectivity rules that integrate white matter connectomics on a macroscale  
 186 and grey matter composition on a mesoscale, using a set of granularity-based connectivity rules.  
 187 To implement the model rules, each region in the Brainnetome atlas was labelled according to its  
 188 granularity index (see figure 1c below). The labelling process was conducted manually according  
 189 to an adapted von Economo- Koskinas atlas (Solari and Stoner 2011; Beul and Hilgetag 2015),  
 190 and similarly to the labelling by Shamir and Assaf (2021a).

191 Each Brainnetome atlas region then holds three components, corresponding to its white matter  
 192 connections, its grey matter laminar composition, and its granularity index. These components are  
 193 crucial for the model application, since its rules use weighting of white matter tracts according to

194  
195  
196  
197  
198  
199  
200  
201  
202  
203  
204  
205  
206  
207  
208  
209

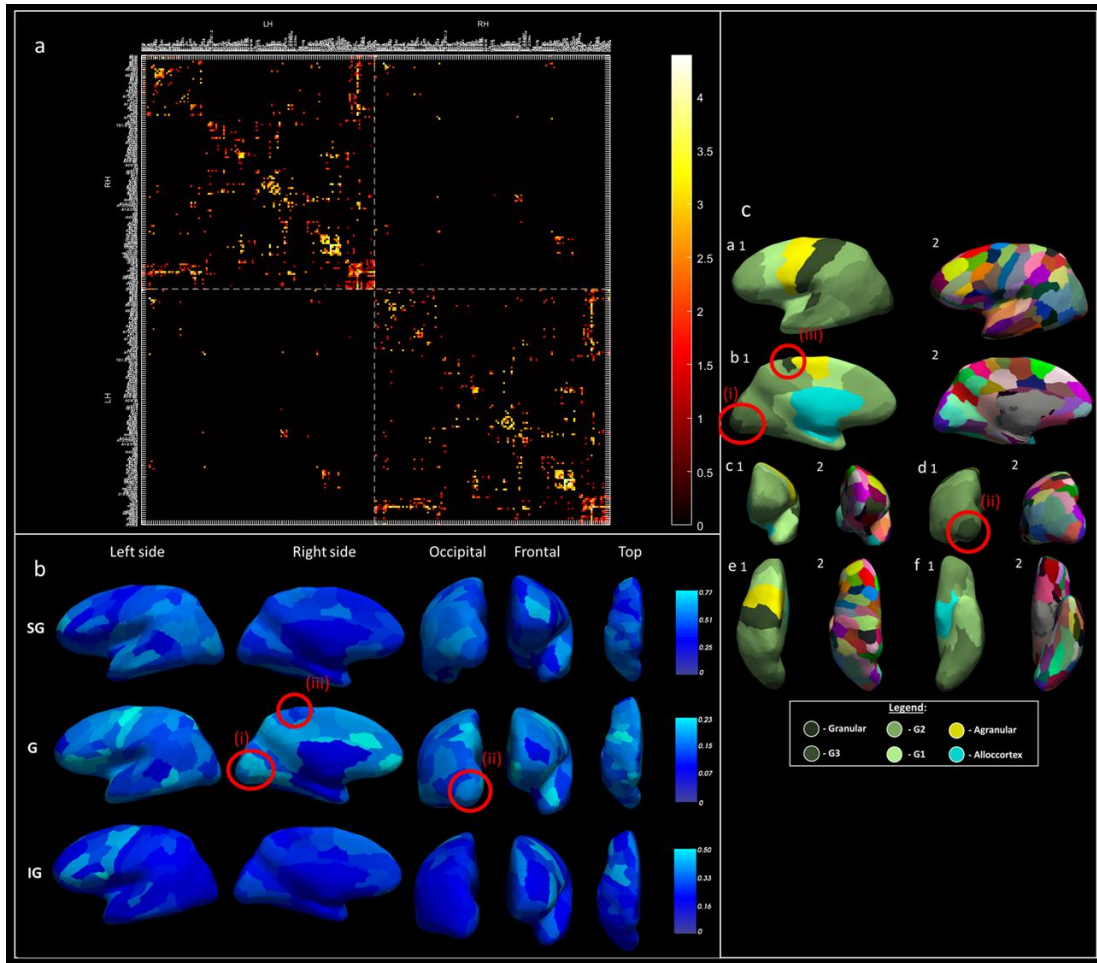

210  
211  
212  
213  
214  
215  
216  
217  
218  
219  
220  
221  
222  
223

**Fig. 1** Average global white and gray matter datasets and estimated granularity indices across Brainnetome atlas regions:

- a- Average cortical connectivity (of all 30 subjects) across left (LH) and right (RH) hemispheres: average connectivity matrix, representing (log(number of tracts)) for connections that appear in at least 75% of subjects (color scheme adapted from Charles 2021)
- b- Average cortical laminar composition (of all 30 subjects) across left hemisphere: where: top row- supragranular layers (SG), middle row- granular layer (G), bottom row- infragranular layers (IG), and columns represent different viewpoints
- c- Granularity indices (left- 1) and Brainnetome atlas regions (right- 2) across left hemisphere, from several viewpoints: left side (a), right side (B), front (C), occipital (D), top (E), and bottom (F)

Features in b and their respective counterparts in c correspond to unique granular presence (circled in red): features (i) and (ii): high presence of granular laminar component in V1 (in b), in correspondence with a high granularity index (in c); feature (iii): low presence of granular laminar component in M1 (in b), in correspondence with a low granularity index (in c)



224 the cortical laminar compositions of the connecting regions based on their respective granularity  
225 indices. The model then addresses two types of cortical connections:

226 a. *Tractography-based (long-range) connections*: tractography-based connections represent  
227 most of the connections in the model, including relatively stronger connections between  
228 different cortical regions, as well as connections between the cortex and the subcortex. They  
229 are expanded to the laminar level according to the rule of connectivity that corresponds to the  
230 connecting regions, their granularity indices, and their laminar compositions.

231 b. *Assumed (short-range) connections*: assumed connections include vertically-oriented  
232 connections between different laminar components within a single cortical region. They are  
233 modelled as relatively weaker connections in the model according to the laminar composition  
234 of each cortical region.

235 For a comprehensive description of the model of cortical laminar connectivity and its data-derived origin,  
236 see (Shamir and Assaf 2021a). The resulting laminar connectome includes three times as many nodes as  
237 the standard connectome since each original regional node now consists of three laminar locations in that  
238 same specific region. A full visualization of the 30-subject average of the resulting model of laminar  
239 connectivity can be seen in figure 2 parts a-b (below). The source code of the average standard and  
240 laminar connectomes, as well as the complete code for modelling a laminar-level connectome, are freely  
241 available for noncommercial use (at [github.com/ittais/Laminar\\_Connectivity](https://github.com/ittais/Laminar_Connectivity)).

242 The variability of the resulting connectomes, representing both standard connectivity and laminar  
243 connectivity across subjects (N=30), are then evaluated (see figure 2 parts b-c). Subsequently, both  
244 connectomes are then explored via a set of neurobiologically meaningful complex network measures  
245 (Rubinov and Sporns 2010).

#### 246 4. **Complex network analysis**

247 Once the standard connectome was extracted and the laminar connectome was modelled, we used tools  
248 for network analysis to explore their connectivity patterns and unique network features:

249 a. **Network complexity**: both connectomes were initially tested for non-trivial topological features  
250 that occur in complex networks, such as a heavy tail in degree distribution, but do not occur in  
251 simple networks, such as random graphs (see figure 3 below).

252  
 253  
 254  
 255  
 256  
 257  
 258  
 259  
 260  
 261  
 262  
 263  
 264  
 265  
 266  
 267  
 268  
 269  
 270  
 271  
 272  
 273  
 274  
 275  
 276  
 277  
 278  
 279  
 280  
 281

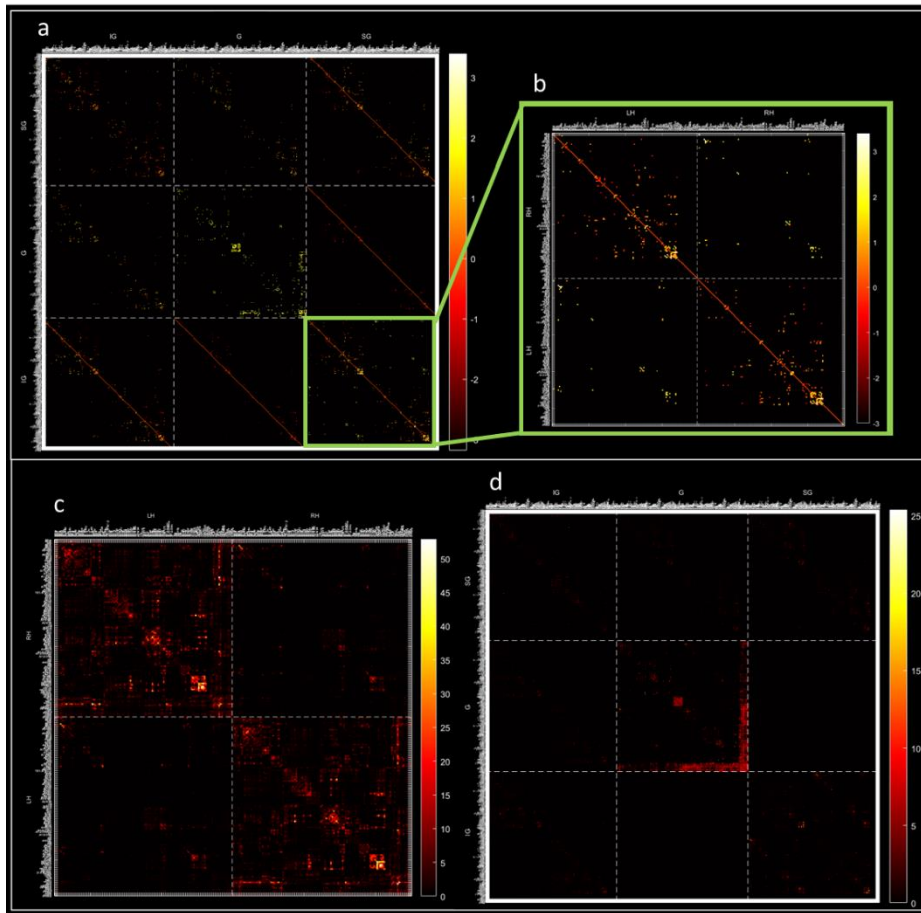

**Fig. 2** 30-subject average cortical laminar connectivity (top) and standard deviations for both connectomes (bottom) across Brainnetome atlas regions:

- a- Average supra-adjacency matrix, representing whole-brain laminar-level connections, where the following abbreviations correspond to laminar components: IG- infragranular, G- granular, SG- supragranular. Model results are displayed as log(number of tracts) for all connections that appear in at least 75% of subjects
  - b- A closer look at the supra-granular-supra-granular component of the average supra-adjacency matrix
  - c- Standard deviation of standard cortical connectomes
  - d- Standard deviation of cortical laminar connectomes (color schemes adapted from Charles 2021)
- b. **Network analysis:** once the complexity of both networks was shown, we explored and compared the average standard connectome to the components of the average laminar connectome. Global connectivity measures, including global efficiency and connectivity density, were chosen for evaluating the cost-efficiency trade-off. Additionally, local connectivity measures of centrality were calculated, including node degree and strength.

282  
 283  
 284  
 285  
 286  
 287  
 288  
 289  
 290  
 291  
 292  
 293  
 294

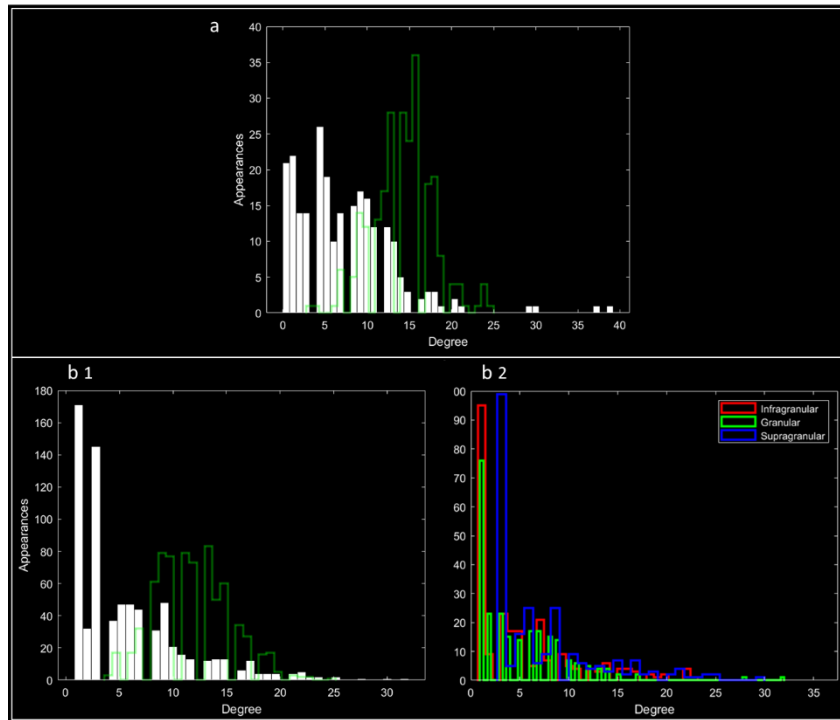

**Fig. 3** Degree distributions:

295 Distributions of degrees for both the standard cortical connectome (a), as well as the cortical laminar  
 296 connectome (b1), of the average connectomes for all connections that appear in at least 75% of subjects.  
 297 Each of the two is presented against a random network with an equal number of nodes and edges  
 298 (histogram outlines in green). For the laminar connectome, distributions for each laminar connectome  
 299 are colored individually (b2): infragranular (IG)- red, granular (G)- green, supragranular (SG)- blue  
 300 Notice the positive skew, or “heavy-tail”, in degree distributions in both cases and expressly in the  
 301 laminar connectome

302 For a schematic representation of our methodology for modelling and analyzing the laminar connectome,  
 303 see Supplementary Material figure 1.

### 304 **Results**

305 After calculating average matrices for both standard cortical and cortical laminar connectomes, the  
 306 variability of both connectomes was evaluated across all N=30 subjects (see figure 2 parts c-d). The  
 307 standard connectome exhibits relatively higher standard deviation values, that correspond to the overall  
 308 higher range of connectivity values. The subcortocortical connections exhibit relatively higher standard  
 309 deviation within each matrix, specifically in the granular to granular connections for the laminar

310 connectome. This can be attributed to the higher connection values of subcortical connections,  
 311 relative to corticocortical connections.

312 Two measures of global network connectivity were calculated for both the average standard and average  
 313 laminar connectomes:

- 314 1. Global efficiency- an efficiency measure representing the average inverse shortest path length in  
 315 the network.
- 316 2. Connection density- a cost measure representing the number of edges in a network as a proportion  
 317 of the maximum possible number of edges.

318 The two measures were then plotted against one another to evaluate the cost-efficiency trade-off  
 319 (Bullmore and Sporns 2012) in both connectomes (see figure 4).

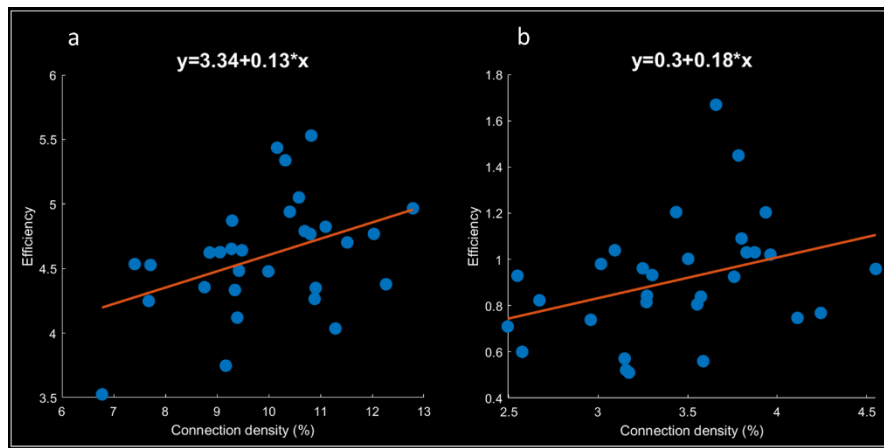

327 **Fig. 4** Cost-efficiency trade-offs of both connectomes:

328 Global efficiency and connection density values, fitted to a linear regression model (top), for all N=30  
 329 subjects, including the standard cortical connectomes (a) and the cortical laminar connectomes (b)

330 Examination of the cost-efficiency trade-off in the cortical laminar connectome shows that both the  
 331 connection density as well as the global efficiency are reduced compared to the standard connectome.

332 Connection density is a value inversely related to the maximum possible number of edges in the standard

333 connectome:  $Max_{edges\ standard} = \frac{N^2-N}{2}$ , where N is the number of nodes in the standard connectome

334 network. The number of nodes in the laminar connectome is  $3 * N$ , since the cortex is divided into three

335 cortical components. Accordingly, the maximum possible number of edges in the laminar connectome

336 for big networks (large enough N):  $Max_{edges\ laminar} \sim 9 * Max_{edges\ standard}$ . Since the density is

337 inversely related to the maximum possible number of edges, theoretically the ratio should be:

338  $Density_{laminar} \sim \frac{1}{9} * Density_{standard}$ . In practice, the laminar connectome exhibits higher density than

339 expected that instead follows:  $Density_{laminar} \sim \frac{1}{3} * Density_{standard}$  (see density value range in figure  
 340 4). Global efficiency is a value inversely related to the mean shortest path (MSP), where:  
 341  $MSP_{standard} \propto N$ . Since the laminar connectome has  $3 * N$  nodes, the efficiency of the laminar  
 342 connectome should follow:  $Efficiency_{laminar} \sim \frac{1}{3} * Efficiency_{standard}$ . In this case, the laminar  
 343 connectome does roughly follow this ratio (see efficiency range in figure 4). Consequently, the efficiency  
 344 to density ratio for the laminar connectome is slightly higher than for the standard connectome.

345 To examine the connectivity patterns of both the standard connectome as well as the cortical laminar  
 346 connectome, we conducted an analysis of a two neurobiologically meaningful network measures  
 347 (Rubinov and Sporns 2010). The following two measures of centrality were included:

- 348 1. Degree- the number of edges connected to a node (see figure 5, below).
- 349 2. Strength- sum of all neighboring edge weights (see figure 6, below)

350 For an exploration of additional measures, including clustering coefficient, local efficiency, and  
 351 core/periphery, see Supplementary Material figure 2.

352

353

354

355

356

357

358

359

360

361

362

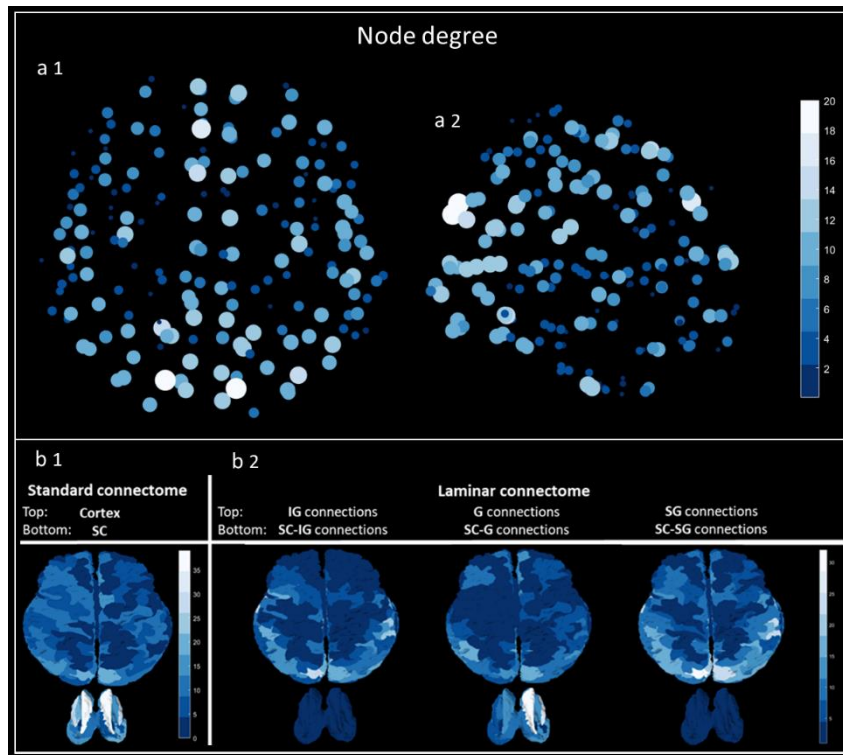

**Fig. 5** Node degree:

363 a- Distribution of degree values for the average standard connectome across cortical regions of the  
 364 Brainnetome atlas, top view (a1) and lateral view (a2)

365 b- Whole-brain distributions of degree values for the average standard connectome (left column)  
 366 compared to the average laminar connectome, including: infragranular (IG), granular (G) and  
 367 supragranular (SG) components (3 right columns, left to right). Each connectome depicts cortical  
 368 connections (top) and subcortical connections (bottom). For each laminar component, cortical  
 369 connections include connections between the specified component and all other components (top),  
 370 and subcortical connections include connections between the specified component and the  
 371 subcortex (bottom)

372 When examining the degree values across cortical regions of the standard connectome, a well-established  
 373 pattern of node centrality appears in the occipital, temporal, and medial parietal cortices (Sporns 2009).  
 374 When examining the degrees across both connectomes, subcortical regions (thalamus, caudate, putamen  
 375 and hippocampus) alongside a set of cortical regions appear as hubs with high degree values, including:  
 376 superior frontal regions (A9m, A10m), superior parietal regions (A7 subregions), superior occipital  
 377 regions (msOccG) and the cuneus (rCunG). These hubs exhibit both high degree and high strength in the  
 378 standard connectome, as well as cumulatively across components of the laminar connectome. The  
 379 infragranular and supragranular components do not include the subcortex but include cortical hubs, while  
 380 the granular component includes the subcortex and mainly non-frontal hubs such superior parietal and  
 381 superior occipital regions.

382  
 383  
 384  
 385  
 386  
 387  
 388  
 389  
 390  
 391  
 392  
 393  
 394

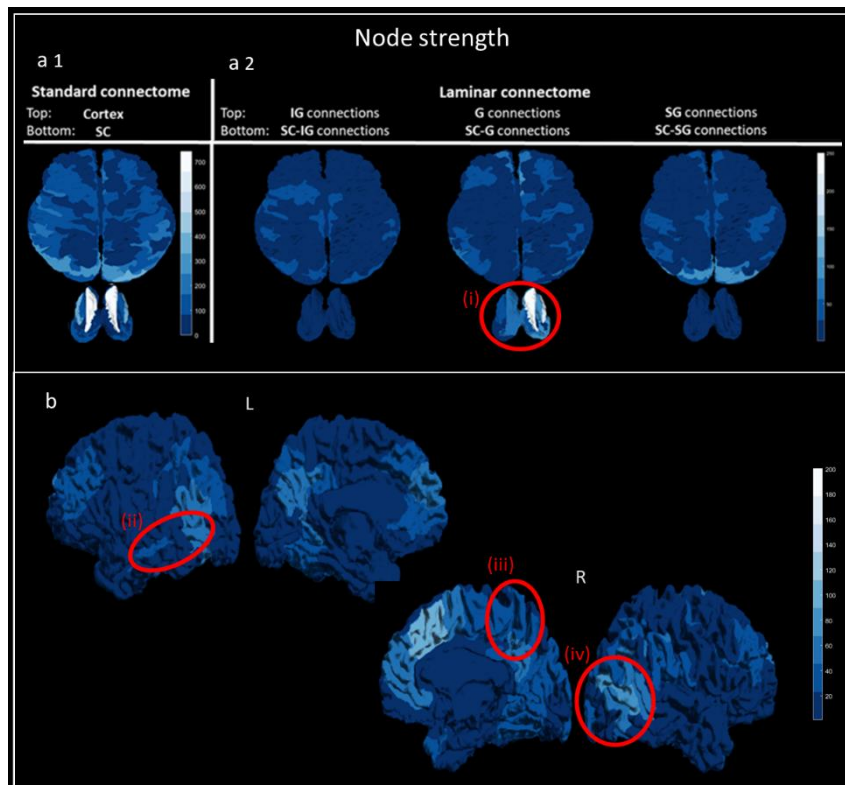

Fig. 6 Node strength:

395 a- Whole-brain distributions of strength values for the average standard connectome (left column)  
396 compared to the average laminar connectome, including: infragranular (IG), granular (G) and  
397 supragranular (SG) components (3 right columns, left to right). Each connectome depicts cortical  
398 connections (top) and subcortical connections (bottom). For each laminar component, cortical  
399 connections include connections between the specified component and all other components (top),  
400 and subcortical connections include connections between the specified component and the  
401 subcortex (bottom). Feature (i) (circled in red) shows high centrality of subcortical regions for the  
402 granular component of the laminar connectome

403 b- Distribution of strength values for the granular (G) component of the laminar connectome across  
404 both left (L, top) and right (R, bottom) hemispheres, from lateral view (left) and sagittal view (right).  
405 Features (circled in red) show high strength values in the auditory cortex (ii), as well as the primary  
406 motor (iii) and primary visual (iv) cortices

407 When examining the strength (weighted degree) values, a similar more generalized pattern appears. In  
408 the standard connectome, the subcortex overpowers the distribution across nodes and exhibits the highest  
409 strength values, followed by occipital and parietal regions. In the laminar connectome, the granular  
410 component exhibits high strength values in the subcortex. A closer examination of the granular  
411 component demonstrates high strength values in the auditory cortex, alongside the primary motor and  
412 primary visual cortices.

## 413 **Discussion**

414 In this study we model and explore the laminar connectome of N=30 healthy subjects using multimodal  
415 MRI imaging datasets. These datasets include both white matter connectivity and grey matter laminar  
416 composition, which are integrated using our novel model of cortical laminar connectivity (Shamir and  
417 Assaf 2021a, b). The resulting laminar-level connectome is then explored across the Brainnetome atlas  
418 regions (Fan et al. 2016) using a set of neurobiologically meaningful complex network measures  
419 (Rubinov and Sporns 2010), while focusing on comparison of the cortical laminar connectome to  
420 standard cortical connectome.

421 When we examine both connectomes on a global scale, several similarities and other differences appear.

422 On the similarity side, both connectomes exhibit a heavy tail in their degree distributions, which is even

423 more noticeable in the laminar connectome. A heavy tail in a degree distribution is a non-trivial  
424 topological feature that occurs in complex networks but does not occur in simple or random networks.  
425 This feature is also associated with higher network resilience to nodal removal (regional damage). On  
426 the difference side, the standard connectome exhibits relatively higher standard deviation values across  
427 subjects, relative to the laminar connectome. This higher variability corresponds to the overall higher  
428 range of connectivity values in the standard connectome. Nonetheless, both connectomes exhibit higher  
429 variability in subcortical connections, which can once again be attributed to stronger connections  
430 relative to corticocortical connections. An additional difference between the two connectomes appears  
431 when exploring the cost-efficiency trade-offs, by plotting global efficiency against connection density.  
432 The laminar connectome exhibits higher connection density than expected based on the relative number  
433 of nodes in the network alone. With regards to efficiency, the laminar connectome exhibits a relatively  
434 lower global efficiency, as expected based on number of nodes alone. However, the efficiency to density  
435 ratio is maintained and even slightly elevated for the laminar connectome in comparison to the standard  
436 connectome.

437 When we examine both connectomes on a local scale using complex network measures, we get a more  
438 nuanced image of connectivity patterns across the brain. Several features appear in the granular  
439 component of the laminar connectome, including high subcortical centrality on a whole-brain level,  
440 alongside high regional centrality in the auditory cortex, M1, and V1 on a cortical level. In addition, the  
441 distributions of degree and strength values in the standard connectome reestablish the notion of a rich-  
442 club bihemispheric organization that includes subcortical regions (van den Heuvel and Sporns 2011,  
443 2013). The distribution of these values across components of the laminar connectome exhibits a  
444 cumulative nature, which is strengthened upon further examination of the core/periphery partitioning in  
445 the standard connectome (for an examination of inter-subject consistency, see Supplementary Material  
446 figure 3). The standard connectome displays a core of highly interconnected hubs across the cortex and  
447 subcortex, a subset of these hubs appears in each individual component of the laminar connectome. The  
448 infragranular component displays hubs across non-frontal cortical regions, the granular component  
449 displays hubs that include subcortical regions, and the supragranular component displays hubs that  
450 include frontal cortical regions.



451 This study presents an innovative exploration of a network model of the healthy human connectome on  
 452 the laminar level. This model embodies a simplified set of laminar-level rules of connections, based on  
 453 a systematic review of histological tract tracing studies (Shamir and Assaf 2021a). While this model has  
 454 been corroborated ex-vivo in the macaque brain (Felleman and Van Essen 1991; Shamir and Assaf  
 455 2021b), corroborating the results in-vivo in the human brain is a more nuanced task. However, our  
 456 network analysis showcases several expected features, mainly concerning high centrality of granular  
 457 connections to visual, motor, and auditory regions.

458 The characterization of the healthy human laminar connectome presented here could support the  
 459 investigating of pathologies that are assumed to involve abnormalities in layer-dependent cortical  
 460 connectivity, such as schizophrenia and autism. Using the network modelling and analysis framework  
 461 presented here, the patterns of connectivity behind such conditions could be further explored and  
 462 elucidated.

463 **References:**

- 464 1. Sporns O, Tononi G, Kötter R (2005) The Human Connectome: A Structural Description of the  
 465 Human Brain. *PLoS Computational Biology* 1(4): e42, 0245-0251.  
 466 <https://doi.org/10.1371/journal.pcbi.0010042>
- 467 2. Van Essen DC, Smith SM, Barch DM, Behrens TEJ, Yacoub E, Ugurbil K (2013) The WU-Minn  
 468 Human Connectome Project: An Overview. *NeuroImage* 80, 62-79.  
 469 <https://doi.org/10.1016/j.neuroimage.2013.05.041>
- 470 3. Setsompop K, Kimmlingen R, Eberlein E, Witzel T, Cohen-Aded J, McNab JA, Keil B, Tisdall MD,  
 471 Hoecht P, Dietz P, Cauley SF, Tountcheva V, Matschl V, Lenz VH, Heberlein K, Potthast A, Thein  
 472 H, Van Horn J, Toga A, Schmitt F, Lehne D, Rosen BR, Wedeen V, Wald LL (2013) Pushing the  
 473 limits of in vivo diffusion MRI for the Human Connectome Project. *NeuroImage*. 80. 220-233.  
 474 <https://doi.org/10.1016/j.neuroimage.2013.05.078>
- 475 4. Assaf Y, Bouznach A, Zomet O, Marom A, Yovel Y (2020) Conservation of brain connectivity and  
 476 wiring across the mammalian class. *Nature Neuroscience*, 23, 805–808.  
 477 <https://doi.org/10.1038/s41593-020-0641-7>
- 478 5. Jbabdi S, Johansen-Berg J (2011) Tractography: Where Do We Go from Here?. *Brain Connectivity*,  
 479 Vol. 1, Num. 3, 169-183. <https://doi.org/10.1089/brain.2011.0033>

- 480 6. Johansen-Berg H (2013) Human connectomics – What will the future demand?. *NeuroImage*, 80,  
 481 541-544. <https://doi.org/10.1016/j.neuroimage.2013.05.082>
- 482 7. Assaf Y, Johansen-Berg H, Thiebaut de Schotten M (2019) The role of diffusion MRI in  
 483 neuroscience. *NMR in Biomedicine*. 32:e3762. <https://doi.org/10.1002/nbm.3762>
- 484 8. Maier-Hein K H, Neher P F, Houde J C, et al. (2017). The challenge of mapping the human  
 485 connectome based on diffusion tractography. *Nature Communications*, 8, 1349.  
 486 <https://doi.org/10.1038/s41467-017-01285-x>
- 487 9. Krupnik R, Yovel Y, Assaf Y (2021). Inner Hemispheric and Interhemispheric Connectivity Balance  
 488 in the Human Brain. *Journal of Neuroscience*, 40, 8351-8361.  
 489 <https://doi.org/10.1523/JNEUROSCI.1074-21.2021>
- 490 10. Clark VP, Courchesne E, Grafe M (1992) In vivo myeloarchitectonic analysis of human striate and  
 491 extrastriate cortex using magnetic resonance imaging. *Cereb Cortex*, 2, 417–424.  
 492 <https://doi.org/10.1093/cercor/2.5.417>
- 493 11. Barbier EL, Marrett S, Danek A, Vortmeyer A, van Gelderen P, Duyn J, Bandettini P, Grafman J,  
 494 Koretsky AP (2002) Imaging cortical anatomy by high-resolution MR at 3.0T: detection of the stripe  
 495 of gennari in visual area 17. *Magnetic Resonance in Medicine*, 48:735–738.  
 496 <https://doi.org/10.1002/mrm.10255>
- 497 12. Duyn JH, van Gelderen P, Li TQ, de Zwart JA, Koretsky AP, Fukunaga M (2007) High-field MRI of  
 498 brain cortical substructure based on signal phase. *PNAS*, 104:28:11796–11801.  
 499 <https://doi.org/10.1073/pnas.0610821104>
- 500 13. Glasser MF, Goyal MS, Preuss TM, Raichle ME, Van Essen DC (2014) Trends and properties of  
 501 human cerebral cortex: correlations with cortical myelin content. *NeuroImage*, 93:165–175.  
 502 <https://doi.org/10.1016/j.neuroimage.2013.03.060>
- 503 14. Shafee R, Buckner RL, Fischl B (2015) Gray matter myelination of 1555 human brains using partial  
 504 volume corrected MRI images. *NeuroImage*, 105:473–485.  
 505 <https://doi.org/10.1016/j.neuroimage.2014.10.054>
- 506 15. Barazany D, Assaf Y (2012) Visualization of Cortical Lamination Patterns with Magnetic Resonance  
 507 Imaging. *Cerebral Cortex*, 22, 2016–2023. <https://doi.org/10.1093/cercor/bhr277>

- 508 16. Lifshits S, Tomer O, Shamir I, Barazany D, Tsarfaty G, Rosset S, Assaf Y (2018) Resolution  
 509 considerations in imaging of the cortical layers. *Neuroimage*, 164, 112–120.  
 510 <https://doi.org/10.1016/j.neuroimage.2017.02.086>
- 511 17. Assaf Y (2019) Imaging laminar structures in the gray matter with diffusion MRI. *Neuroimage*.  
 512 197:677-688. <https://doi.org/10.1016/j.neuroimage.2017.12.096>
- 513 18. Lifshits S, Tomer O, Shamir I, Barazany D, Tsarfaty G, Rosset S, Assaf Y (2018) Resolution  
 514 considerations in imaging of the cortical layers. *NeuroImage*, 164, 112-120.  
 515 <https://doi.org/10.1016/j.neuroimage.2017.02.086>
- 516 19. Peel D, McLachlan G J (2000) Robust mixture modelling using the t distribution. *Statistics and*  
 517 *computing*. 10(4), 339-348. <https://doi.org/10.1023/A:1008981510081>
- 518 20. Solari, S V H, Stoner, R (2011). Cognitive consilience: primate nonprimary neuroanatomical  
 519 circuits underlying cognition. *Frontiers in Neuroanatomy*, 4(65), 1–23.  
 520 <https://doi.org/10.3389/fnana.2011.00065>
- 521 21. Beul S F, Hilgetag C C (2014). Towards a "canonical" agranular cortical microcircuit. *Frontiers in*  
 522 *Neuroanatomy*, 165, 8. <https://doi.org/10.3389/fnana.2014.00165>
- 523 22. Shamir I, Tomer O, Baratz Z, Tsarfaty G, Faraggi M, Horowitz A, Assaf Y (2019) A framework for  
 524 cortical laminar composition analysis using low-resolution T1 MRI images. *Brain Structure and*  
 525 *Function*, vol. 224, is. 4, 1457-1467. <https://doi.org/10.1007/s00429-019-01848-2>
- 526 23. Lotan E, Tomer O, Tavor I, Blatt I, Goldberg-Stern H, Hoffmann C, Tsarfaty G, Tanne D, Assaf Y  
 527 (2021). Widespread cortical dyslamination in epilepsy patients with malformations of cortical  
 528 development. *Neuroradiology*. 63 (2), 225-234. <https://doi.org/10.1007/s00234-020-02561-2>
- 529 24. Fischl B (2012) FreeSurfer. *NeuroImage* 62:774–781.  
 530 <https://doi.org/10.1016/j.neuroimage.2012.01.021>
- 531 25. Park HJ, Friston K (2013). Structural and functional brain networks: from connections to cognition,  
 532 *Science*, 342, 1238411. <https://doi.org/10.1126/science.1238411>
- 533 26. Shamir I, Assaf Y (2021a). An MRI-based, data-driven model of cortical laminar connectivity.  
 534 *Neuroinformatics*, vol. 19, 205–218. <https://doi.org/10.1007/s12021-020-09491-7>
- 535 27. Shamir I, Assaf Y (2021b) Modelling cortical laminar connectivity in the macaque brain.  
 536 *Neuroinformatics*. <https://doi.org/10.1007/s12021-021-09539-2>

- 537 28. Rubinov M, Sporns O (2010) Complex network measures of brain connectivity: Uses and  
 538 interpretations. *NeuroImage*, 52(3): 1059-1069. <https://doi.org/10.1016/j.neuroimage.2009.10.003>
- 539 29. Fan L, Li H, Zhuo J, Zhang Y, Wang J, Chen L, Yang Z, Chu C, Xie S, Laird AR, Fox PT, Eickhoff  
 540 SB, Yu C, Jiang T (2016) The Human Brainnetome Atlas: A New Brain Atlas Based on Connectional  
 541 Architecture. *Cerebral Cortex*, 26-8, 3508–3526. <https://doi.org/10.1093/cercor/bhw157>
- 542 30. Van den Heuvel MP, Sporns O (2011) Rich-club Organization of the Human Connectome. *Journal*  
 543 *of Neuroscience*, 31(44), 15775-15786. <https://doi.org/10.1523/JNEUROSCI.3539-11.2011>
- 544 31. Van den Heuvel MP, Sporns O (2013) Network hubs in the human brain. *Trends in Cognitive*  
 545 *Sciences*, 17(12), 683:696. <https://doi.org/10.1016/j.tics.2013.09.012>
- 546 32. Tournier JD, Smith RE, Raffelt D, Tabbara R, Dhollander T, Pietsch M, Christiaens D, Jeurissen B,  
 547 Yeh C H, Connelly A (2019) MRtrix3: A fast, flexible and open software framework for medical  
 548 image processing and visualization. *NeuroImage*. 2019, 202, 116–37.  
 549 <https://doi.org/10.1016/j.neuroimage.2019.116137>
- 550 33. Bullmore E, Sporns O (2012) The economy of brain network organization. *Nature Reviews*  
 551 *Neuroscience*, 13(5), 336-49. <https://doi.org/10.1038/nrn3214>
- 552 34. Sporns O (2009). Diffusion MRI- From Quantitative Measurement to Neuroanatomy, Chapter 14 -  
 553 The Human Connectome: Linking Structure and Function in the Human Brain. Academic Press, 309-  
 554 332. <https://doi.org/10.1016/B978-0-12-374709-9.00014-6>
- 555 35. Charles (2021) cbrewer: colorbrewer schemes for Matlab  
 556 ([https://www.mathworks.com/matlabcentral/fileexchange/34087-cbrewer-colorbrewer-schemes-for-](https://www.mathworks.com/matlabcentral/fileexchange/34087-cbrewer-colorbrewer-schemes-for-matlab)  
 557 [matlab](https://www.mathworks.com/matlabcentral/fileexchange/34087-cbrewer-colorbrewer-schemes-for-matlab)), MATLAB Central File Exchange. Retrieved March 15, 2021.
- 558 36. Felleman DJ, Van Essen DC (1991) Distributed Hierarchical Processing in the Primate Cerebral  
 559 Cortex. *Cerebral Cortex*, 1, 1-47. <https://doi.org/10.1093/cercor/1.1.1>

## 560 **Statements & Declarations**

### 561 **Funding**

562 The authors declare that no funds, grants, or other support were received during the preparation of this  
 563 manuscript.

### 564 **Competing Interests**

565 The authors have no relevant financial or non-financial interests to disclose.

566 **Data Availability**

567 The datasets generated during and/or analyzed during the current study are available in the following  
568 GitHub repository: [https://github.com/ittais/Laminar\\_Connectivity](https://github.com/ittais/Laminar_Connectivity)

569 **Ethics approval**

570 This study was performed in line with the principles of the Declaration of Helsinki. The imaging protocol  
571 was approved by the institutional review boards of Sheba Medical Center and Tel Aviv University, where  
572 the MRI investigations were performed.

573 **Consent to participate**

574 Written Informed consent was obtained from all individual participants included in the study.

575 **Consent to publish**

576 The authors affirm that human research participants provided informed consent before enrollment in the  
577 study, including consent to publish the images resulting from the study.
